# Supplementary material
Source: publisher site journal article supplement (https://www.dovepress.com/article/338394)
Supplement: Supplementary file 1 [file get_supplementary_file.php]

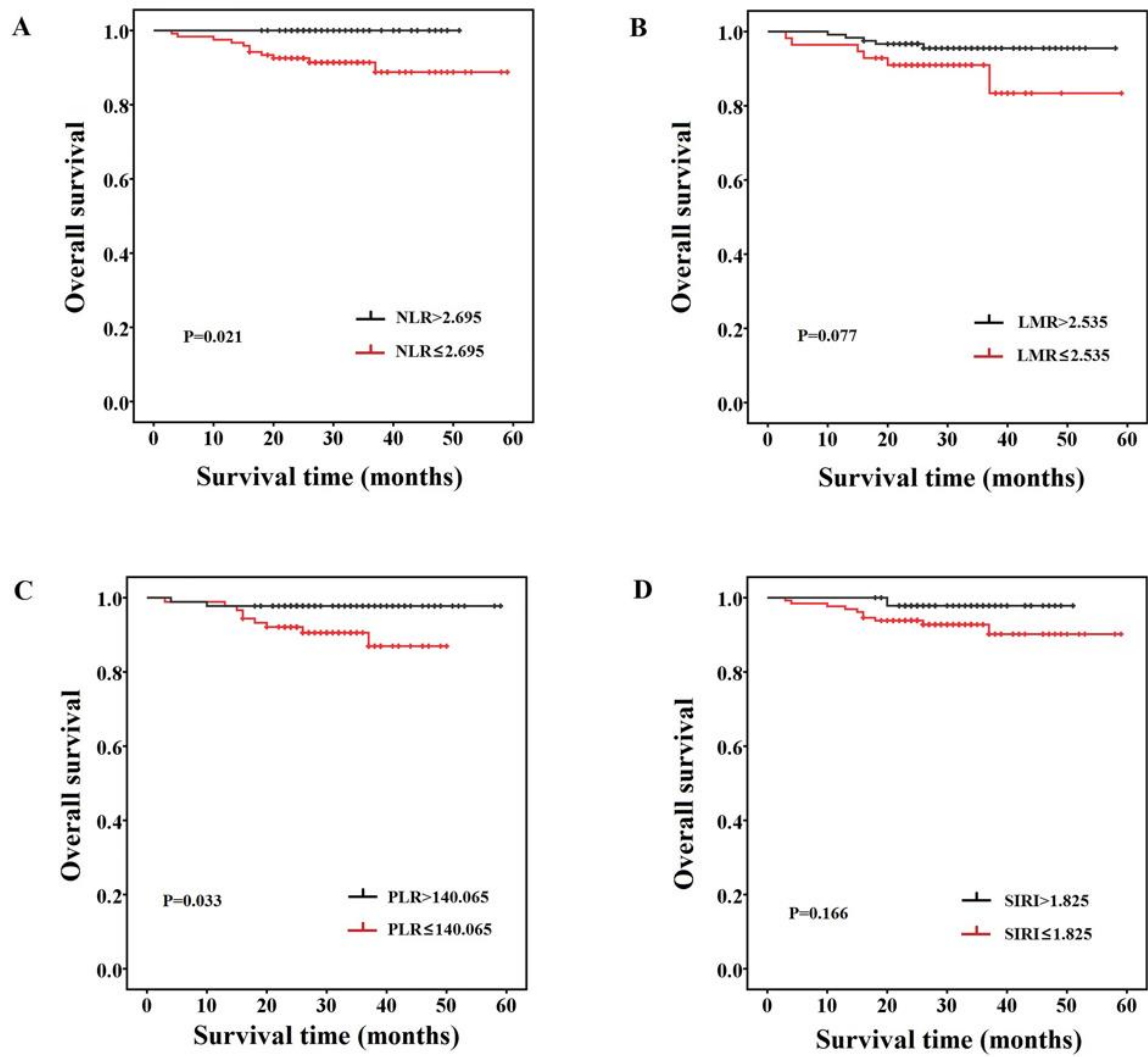

**Supplemental Figure 1** The Kaplan-Meier survival curves of NLR (A), LMR (B), PLR (C), SIRI (D) based on the overall survival (OS) in stage III-IV NPC patients.

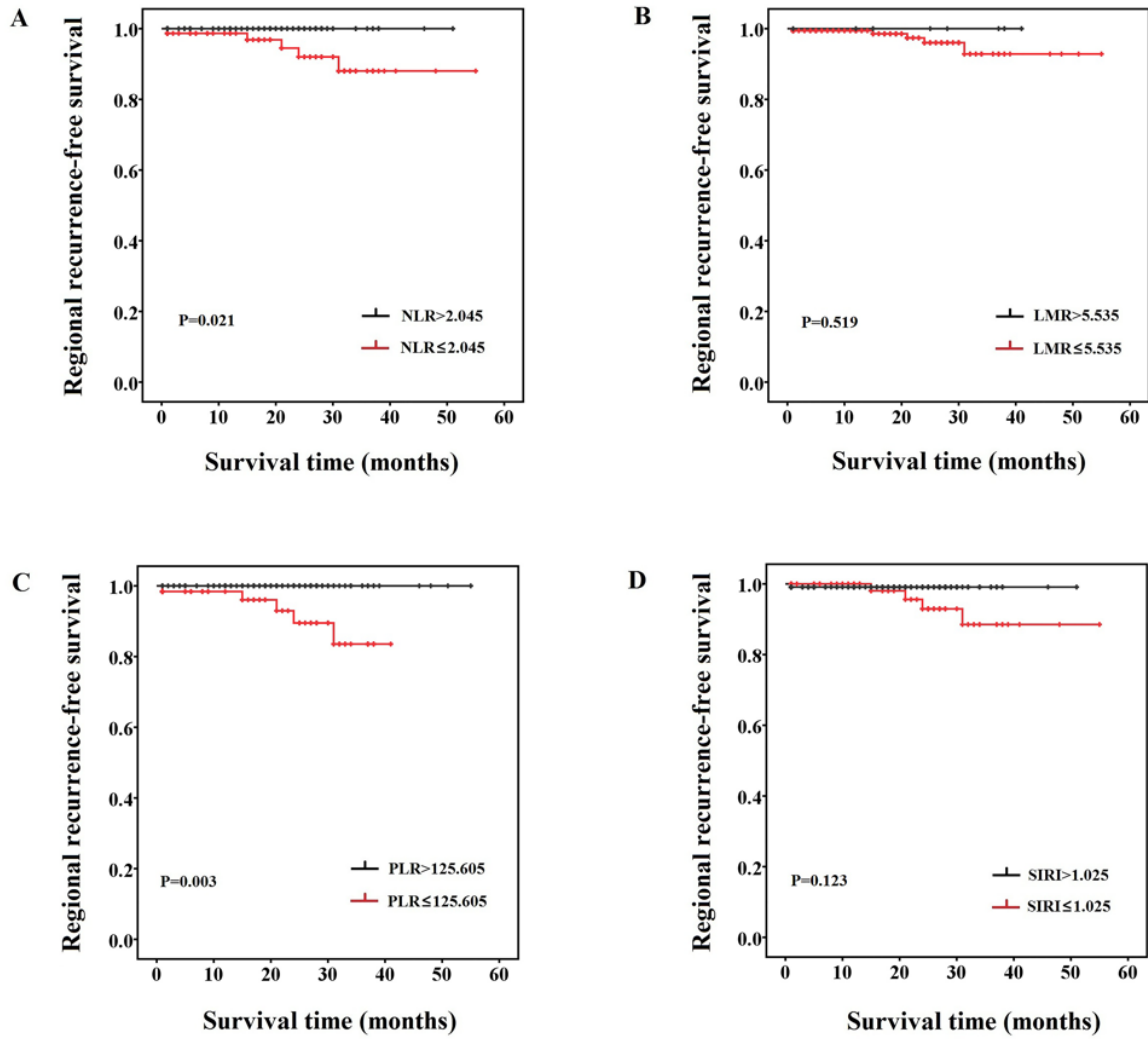

**Supplemental Figure 2** The Kaplan-Meier survival curves of NLR (A), LMR (B), PLR (C), SIRI (D) based on the regional recurrence-free survival (RRFS) in stage III-IV NPC patients.

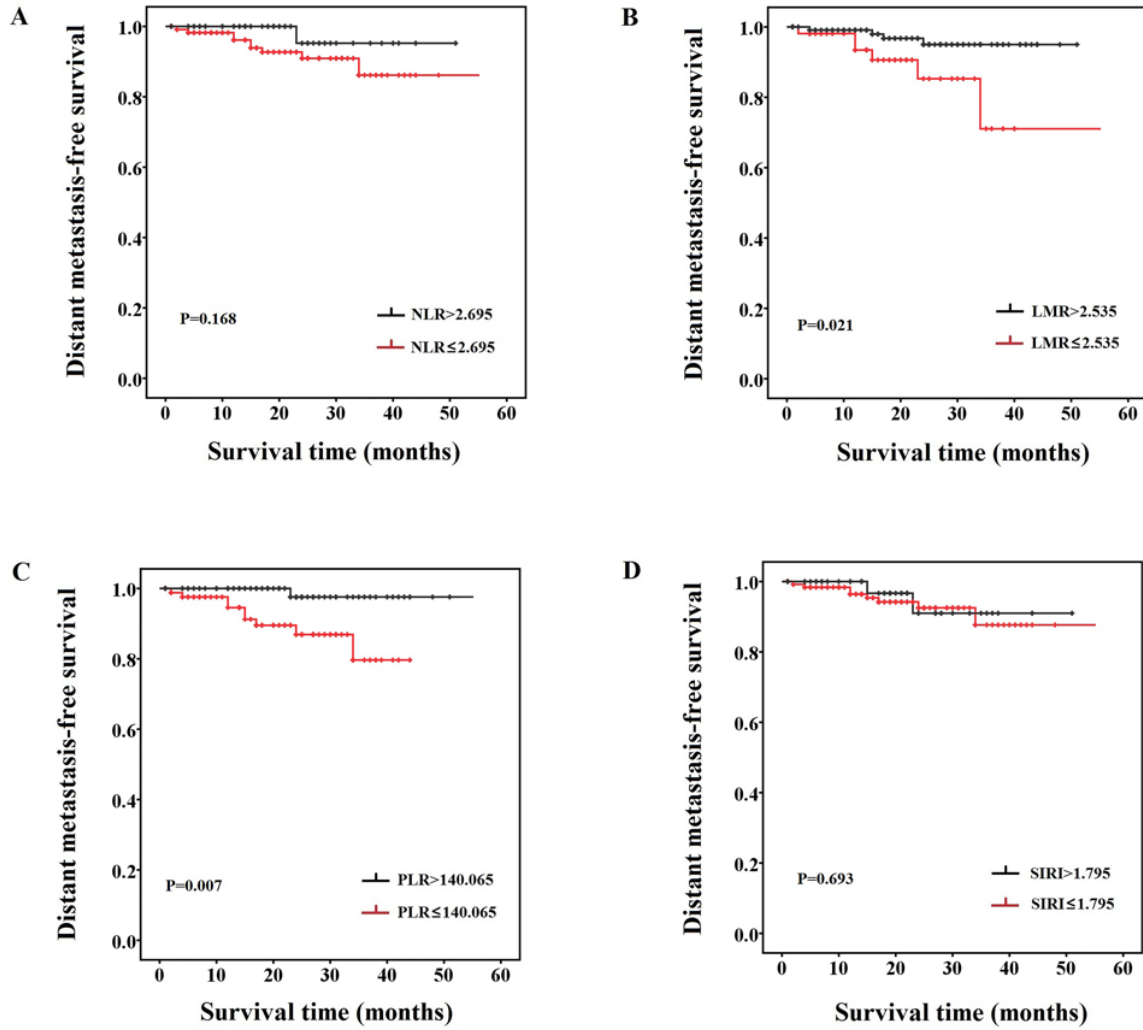

**Supplemental Figure 3** The Kaplan-Meier survival curves of NLR (A), LMR (B), PLR (C), SIRI (D) based on the distant metastasis-free survival (DMFS) in stage III-IV NPC patients.

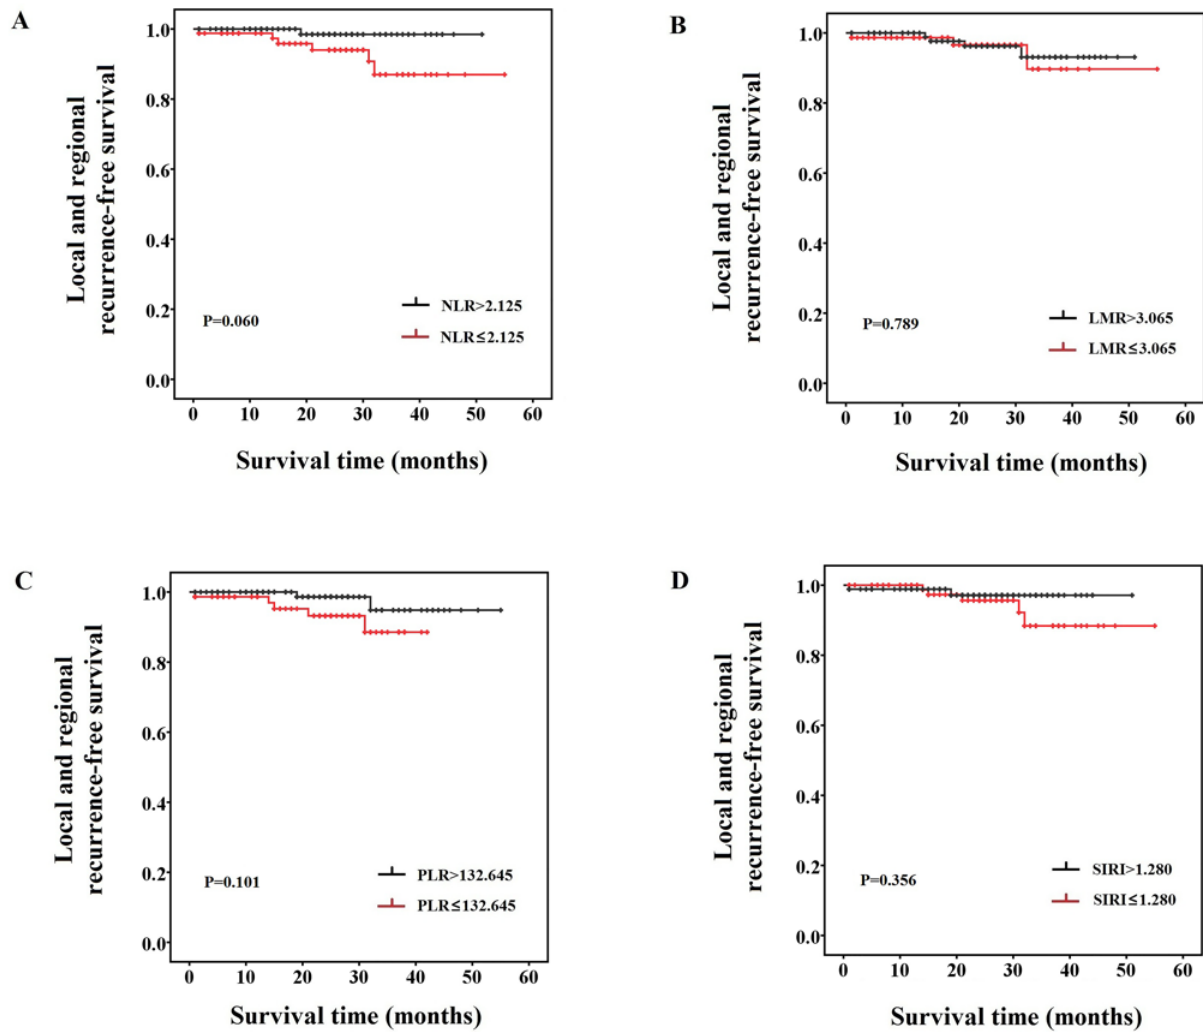

**Supplemental Figure 4** The Kaplan-Meier survival curves of NLR (A), LMR (B), PLR (C), SIRI (D) based on the locoregional recurrence-free survival (LRRFS) in stage III-IV NPC patients.
